# Supplementary material for: Diffusive equilibration of N 2 , O 2 and CO 2 mixing ratios in a 1.5-million-years-old ice core
Source: Copernicus journal article supplement (doi:10.5194/tc-8-245-2014), 2014-02-17
Supplement: Supplementary file 1 [file tc-8-245-2014-supplement.pdf]

# 1 **Diffusive equilibration of N<sub>2</sub>, O<sub>2</sub> and CO<sub>2</sub> mixing** 2 **ratios in a 1.5 million years old ice core**

## 3 **Authors**

4 Bernhard Bereiter (bereiter@climate.unibe.ch)<sup>1</sup>, Hubertus Fischer (hfischer@climate.unibe.ch)<sup>1</sup>,  
5 Jakob Schwander (schwander@climate.unibe.ch), Thomas F. Stocker (stocker@climate.unibe.ch)<sup>1</sup>

6 <sup>1</sup>Climate and Environmental Physics, Physics Institute, University of Bern, Sidlerstrasse 5, CH-  
7 3012 Bern, Switzerland, and Oeschger Centre for Climate Change Research, University of Bern,  
8 Switzerland

9

## 10 **Supplement: Model Sensitivity Tests**

11 Here we show three different model sensitivity tests for the Oldest Ice Core simulations. The first  
12 two tests regard uncertainties in two ice parameter, since these values (Table 1) are not well  
13 constrained: the tuning parameter  $p$  and the bedrock temperature/geothermal heat flux ( $Q_g$ ). The  
14 third test regards the very low total air permeation coefficients of Uchida et al. (2011).

15 For the Oldest Ice Core simulations shown in section 4 we used a theoretical value for the tuning  
16 parameter  $p$  (vertical ice flow tuning parameter) calculated according to Parrenin et al. (2007b).  
17 This theoretical value, however, is not applicable for the EDC and the Dome Fuji ice cores  
18 (Parrenin et al., 2007b). Realistic  $p$  values for these ice cores are in the range of 1-4, which is  
19 significantly lower than the theoretical ones (see section 2.2 for more details). In order to test the  
20 sensitivity of our results in this regard, we have performed an Oldest Ice Core simulation  
21 comparable to the one shown in Fig. 6, but using our  $p$  value for the EDC ice core simulations (red  
22 lines in Fig. A1). Since the change of the  $p$  value results also in different age-depth and  
23 temperature-depth distributions, we also adjusted the geothermal heat flux  $Q_g$  in addition to the  $p$   
24 value in order to keep the ice temperature of the 1.5 Myr old ice (130 m above bedrock) equal to the  
25 standard simulation. In this way the difference between the results for the 1.5 Myr old ice of the  
26 standard and the  $p$ -test simulation is a measure for the influence of the ice flow tuning parameter  $p$ .  
27 Due to the weaker thinning of the deep ice in the  $p$ -test simulation, the result for O<sub>2</sub>/N<sub>2</sub> in 1.5 Myr  
28 old ice shows a 15% weaker dampening compared to the standard run, with a total amplitude  
29 dampening of 65%. With respect to the large uncertainties in the gas parameters, the uncertainty in  
30 the  $p$  value is not critical.

31 For the bedrock temperature sensitivity test, we have used the standard Oldest Ice Core parameters  
32 of Table 1 with the only difference of a geothermal heat flux  $Q_g$  of  $50 \text{ mW/m}^2$  (green lines in Fig.  
33 A1). This results in a bedrock ice temperature of about 260 K, roughly 5 K lower than in the  
34 standard simulations. The influence of the lower temperature is comparable to the influence of the  
35 lower  $p$  value and is therefore also not critical for the findings in this work. A lower bedrock  
36 temperature is also likely to be found at a location where the ice sheet is significantly thinner than  
37 assumed in our Oldest Ice Core simulations. But for a given accumulation rate a thinner ice sheet  
38 also implies thinner annual layers on average, with consequently higher diffusion rates. Hence, the  
39 gain of lower bedrock temperatures at a place with a thinner ice sheet would to some extent be  
40 compensated by thinner annual layers.

41 For temperatures near the bedrock, where the majority of diffusive dampening takes place, the  
42 estimate of total air permeation in ice of Uchida et al. (2011) suggests lower permeabilities than the  
43 SS parameters (see Fig. 2). For temperatures below the BCTZ the same estimate suggests higher  
44 permeabilities similar to the SS parameters, which is not supported by the results in section 3.  
45 Nonetheless, we tested the influence of such low permeabilities. Since the estimate of Uchida et al.  
46 (2011) does only give total air permeabilities and not for the single components, we mimicked such  
47 low permeabilities by scaling down the SS and FS parameters, respectively, with a constant factor  
48 such that they reached the total air permeability of Uchida et al. (2011) at 265 K (bedrock  
49 temperature). This approach results also in lower total air permeability compared to Uchida et al.  
50 (2011) throughout the ice core with the exception of the very bottom since we kept the temperature  
51 sensitivities of the original sets equal. Therefore the results of the corresponding two simulations  
52 are actually representing even lower total air permeabilities than suggested by Uchida et al. (2011).  
53 The two simulations (one for downscaled SS and one for downscale FS parameters) show very  
54 similar results for which reason only the FS result is shown in Fig. A1. The original  $O_2/N_2$   
55 amplitude is damped by about 50% after 1.5 Myr (30% less as for the standard run) suggesting that  
56 also with lower air permeabilities in the range of Uchida et al. (2011) the precessional  $O_2/N_2$  signal  
57 is significantly dampened in this case. However, the precessional signal would not be lost and,  
58 hence, orbital tuning of the ice age scale using  $O_2/N_2$  would still be possible.

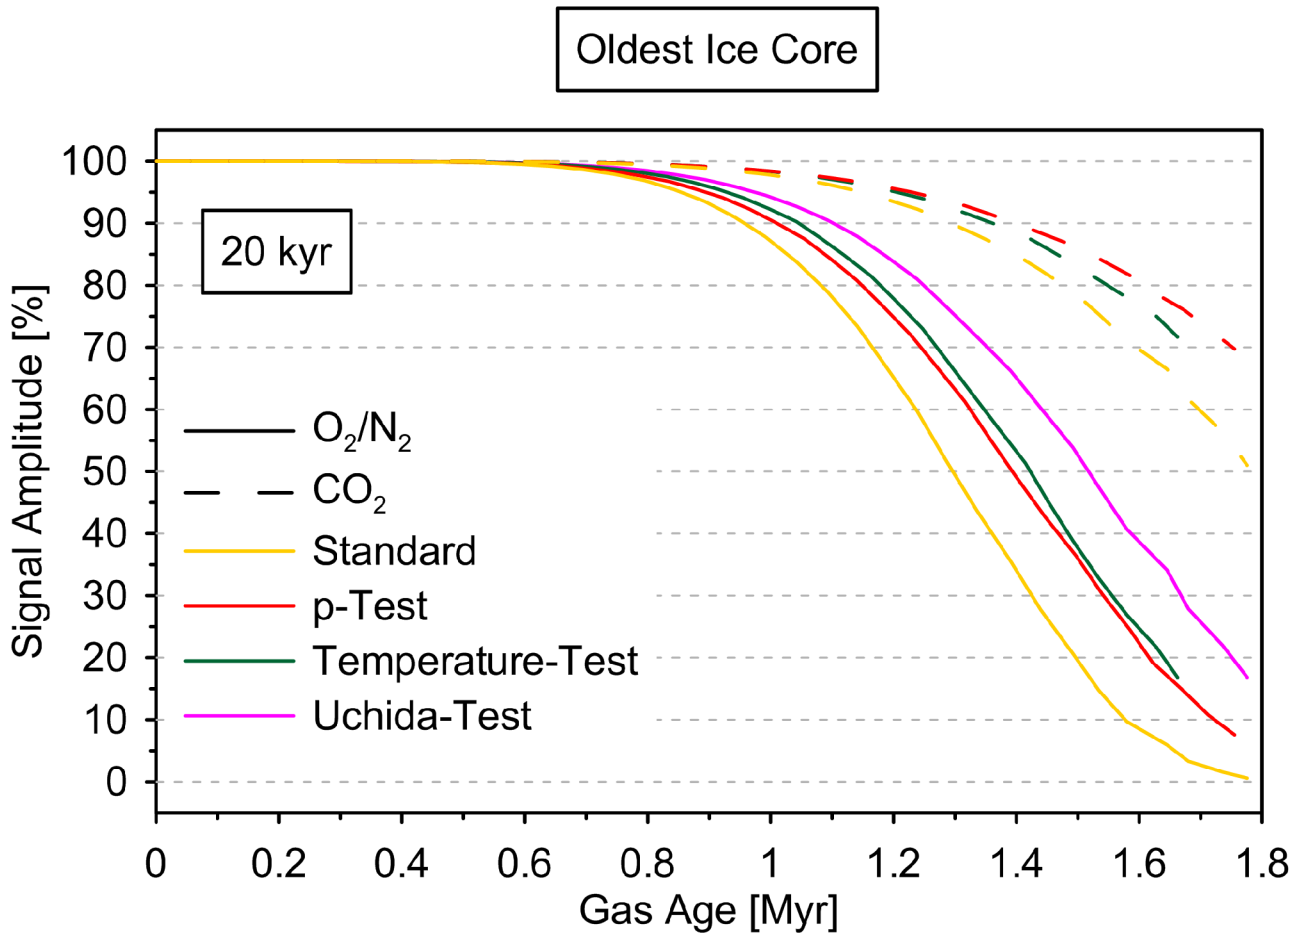

59 Figure A1: Simulated amplitude dampening of CO<sub>2</sub> concentration (dashed lines) and O<sub>2</sub>/N<sub>2</sub> ratio  
 60 (solid lines) signals with a 20 kyr period. The yellow lines represent the results of the standard  
 61 Oldest Ice Core parameters set of Table 1 and the SS parameters (also shown in Fig. 8). The  
 62 magenta line (Uchida-Test) shows the results using the same ice parameters, but downscaled FS  
 63 parameters (see text). The other coloured lines represent results using the SS parameters as in the  
 64 standard run but with different sets of Oldest Ice Core parameters: red:  $p = 3.8$ ,  $Q_g = 56 \text{ mW/m}^2$ ;  
 65 green:  $Q_g = 50 \text{ mW/m}^2$ .

66
